# Supplementary material for: Glycogen accumulation, central carbon metabolism, and aging of hematopoietic stem and progenitor cells
Source: PubMed Central journal article supplement (PMC7360735; doi:10.1038/s41598-020-68396-2), 2020-07-14
Supplement: 41598_2020_68396_MOESM1_ESM.pdf [file 41598_2020_68396_MOESM1_ESM.pdf]

Supplementary Information to

**Glycogen Accumulation, Central Carbon Metabolism, and Aging of Hematopoietic Stem and Progenitor Cells**

Laura Poisa-Beiro<sup>#1,2</sup>, Judith Thoma<sup>#3,4</sup>, Jonathan Landry<sup>5</sup>, Sven Sauer<sup>6</sup>, Akihisa Yamamoto<sup>4</sup>, Volker Eckstein<sup>1</sup>, Natalie Romanov<sup>7</sup>, Simon Raffel<sup>1</sup>, Georg F. Hoffmann<sup>6</sup>, Peer Bork<sup>2,7</sup>, Vladimir Benes<sup>5</sup>, Anne-Claude Gavin<sup>2,7,8</sup>, Motomu Tanaka<sup>\*3,4</sup>, Anthony D. Ho<sup>\*1,2,4</sup>

1. Department of Medicine V, Heidelberg University, Im Neuenheimer Feld 410, 69120 Heidelberg, Germany
2. Molecular Medicine Partnership Unit Heidelberg, EMBL and Heidelberg University, 69120 Heidelberg, Germany
3. Physical Chemistry of Biosystems, Institute of Physical Chemistry, Heidelberg University, Im Neuenheimer Feld 253, 69120 Heidelberg, Germany
4. Center for Integrative Medicine and Physics, Institute for Advanced Study, Kyoto University, 606-8501 Kyoto, Japan
5. European Molecular Biology Laboratory (EMBL), Genomics Core Facility, Meyerhofstrasse 1, 69117 Heidelberg, Germany
6. Division of Child Neurology and Metabolic Diseases, Centre for Child and Adolescent Medicine, University Hospital Heidelberg, Im Neuenheimer Feld 430, 69120, Heidelberg, Germany
7. European Molecular Biology Laboratory (EMBL), Structural and Computational Biology Unit, Meyerhofstrasse 1, 69117 Heidelberg, Germany
8. Department for Cell Physiology and Metabolism, Centre Medical Universitaire, University of Geneva, Rue Michel-Servet 1, CH-1211 Geneva 4, Switzerland

# Equal contributions

\* Corresponding authors:

anthony\_dick.ho@urz.uni-heidelberg.de, tanaka@uni-heidelberg.de

## Supplementary Tables:

### Table S1

| Activity in mOD/min per million cells |     |        |          |                  |                            |            |                               |
|---------------------------------------|-----|--------|----------|------------------|----------------------------|------------|-------------------------------|
| ID                                    | Age | Gender | Aldolase | Adenylate kinase | Triose-phosphate isomerase | Hexokinase | Pyruvate Kinase High Affinity |
| 214                                   | 29  | m      | 9.54     | 5.47             | 100.50                     | 4.02       | 20.52                         |
| 219                                   | 19  | f      | 15.08    | 5.96             | 105.75                     | 4.13       | 21.72                         |
| 221                                   | 71  | f      | 2.12     | 3.32             | 71.60                      | 1.27       | 5.81                          |
| 309                                   | 21  | f      | 0.87     | 3.61             | 34.70                      | 0.29       | 7.03                          |
| 308                                   | 23  | m      | 6.38     | 10.95            | 125.17                     | 1.14       | 18.54                         |
| 307                                   | 44  | m      | 10.74    | 17.07            | 172.77                     | 2.50       | 22.43                         |
| 305                                   | 62  | f      | 7.36     | 11.27            | 163.33                     | 2.29       | 11.28                         |
| 303                                   | 69  | m      | 7.78     | 11.58            | 109.26                     | 1.66       | 9.58                          |
| 302                                   | 59  | m      | 7.64     | 10.85            | 176.54                     | 2.09       | 6.23                          |
| 214                                   | 29  | m      | 0.46475  | 0.26667          | 4.89819                    | 0.19573    |                               |
| 219                                   | 19  | f      | 0.69446  | 0.27455          | 4.86869                    | 0.19015    |                               |
| 221                                   | 71  | f      | 0.36560  | 0.57155          | 12.32806                   | 0.21785    |                               |
| 309                                   | 21  | f      | 0.12355  | 0.51296          | 4.93634                    | 0.04163    |                               |
| 308                                   | 23  | m      | 0.34411  | 0.59049          | 6.75040                    | 0.06167    |                               |
| 307                                   | 44  | m      | 0.47883  | 0.76126          | 7.70273                    | 0.11164    |                               |
| 305                                   | 62  | f      | 0.65265  | 0.99898          | 14.47719                   | 0.20257    |                               |
| 303                                   | 69  | m      | 0.81267  | 1.20953          | 11.41047                   | 0.17354    |                               |
| 302                                   | 59  | m      | 1.22589  | 1.74099          | 28.33199                   | 0.33516    |                               |
|                                       |     | Mean   | 0.57     | 0.77             | 10.63                      | 0.17       |                               |
|                                       |     | SD     | 0.32     | 0.48             | 7.53                       | 0.09       |                               |
| z-Standard-ization                    | 29  | m      | -0.339   | -1.053           | -0.762                     | 0.289      |                               |
|                                       | 19  | f      | 0.377    | -1.037           | -0.766                     | 0.227      |                               |
|                                       | 71  | f      | -0.649   | -0.415           | 0.225                      | 0.538      |                               |
|                                       | 21  | f      | -1.403   | -0.537           | -0.757                     | -1.443     |                               |
|                                       | 23  | m      | -0.716   | -0.375           | -0.516                     | -1.218     |                               |

|    |   |        |        |        |        |
|----|---|--------|--------|--------|--------|
| 44 | m | -0.296 | -0.018 | -0.389 | -0.656 |
| 62 | f | 0.246  | 0.480  | 0.510  | 0.366  |
| 69 | m | 0.745  | 0.921  | 0.103  | 0.040  |
| 59 | m | 2.034  | 2.034  | 2.350  | 1.856  |

**Table S1. Enzyme activities of representative enzymes for the glycolytic pathway**

The activities of key enzymes for the glycolytic pathway, aldolase, hexokinase, triosephosphate isomerase, as well as adenylate kinase, were assessed in 9 human subjects (age range: 19 years to 71 years). A major problem with enzyme assays for human samples is biological variance. To resolve this challenge, we have normalized enzymes that have been associated to a highly glycolytic phenotype to the ones associated with a normal glycolytic state, the latter being pyruvate kinase “high affinity”. This internal normalization was able to eliminate a lot of noise and accounts for individual differences of overall glycolysis activity.

**Table S2**

|                               |                | Aldolase | Adenylate-kinase | Triose-phosphate isomerase | Hexokinase |
|-------------------------------|----------------|----------|------------------|----------------------------|------------|
| One-sided t-test              | 19             | 0.377    | -1.037           | -0.766                     | 0.227      |
|                               | 21             | -1.403   | -0.537           | -0.757                     | -1.443     |
|                               | 23             | -0.716   | -0.375           | -0.516                     | -1.218     |
|                               | 29             | -0.339   | -1.053           | -0.762                     | 0.289      |
|                               | 44             | -0.296   | -0.018           | -0.389                     | -0.656     |
|                               | 59             | 2.034    | 2.034            | 2.350                      | 1.856      |
|                               | 62             | 0.246    | 0.480            | 0.510                      | 0.366      |
|                               | 69             | 0.745    | 0.921            | 0.103                      | 0.040      |
|                               | 71             | -0.649   | -0.415           | 0.225                      | 0.538      |
|                               | p-value        | 0.07     | 0.02             | 0.01                       | 0.04       |
| Correlation coefficient trend | R <sup>2</sup> | 0.21     | 0.43             | 0.42                       | 0.33       |
| Mean                          |                | Aldolase | Adenylate-kinase | Triose-phosphate isomerase | Hexokinase |
| Young                         |                | -0.52    | -0.75            | -0.70                      | -0.54      |
| Old                           |                | 0.59     | 0.75             | 0.80                       | 0.70       |

**Table S2. Statistical analysis**

Statistical analysis of the changes in enzyme activities of the glycolytic pathway, aldolase, hexokinase, triosephosphate isomerase, as well as adenylate kinase. After z-standardization. one-sided t-test was used based on the hypothesis that activities were higher in older subjects than younger subjects. Subject at age 44 was excluded from the analysis as this represents the median.

**Table S3**

| <b>Myeloid</b> | <b>Lymphoid</b> |
|----------------|-----------------|
| PRKG2          | IRF8            |
| GUCY1A3        | ADA             |
| GUCY1B3        | PAG1            |
| TBXAS1         | MZB1            |
| PTGS1          | DNTT            |
| PML            | LAT2            |
| PSTPIP2        | RCSD1           |
| TFRC           | CD19            |
|                | IL7R            |
|                | EBF1            |
|                | MME             |
|                | PAX5            |

**Table S3: Gene markers for myeloid- versus lymphoid differentiation potentials**

List of gene markers for the single cell RNA analysis that are considered to be specific for myeloid or lymphoid differentiation.

**Table S4:**

| Gene Name | Description                                                                                                                                                                                                                                                                                                                                                                                                                                                              |
|-----------|--------------------------------------------------------------------------------------------------------------------------------------------------------------------------------------------------------------------------------------------------------------------------------------------------------------------------------------------------------------------------------------------------------------------------------------------------------------------------|
| PYGB      | Glycogen phosphorylase that regulates glycogen mobilization (PubMed: <a href="#">27402852</a> ). Phosphorylase is an important allosteric enzyme in carbohydrate metabolism (PubMed: <a href="#">3346228</a> ). Enzymes from different sources differ in their regulatory mechanisms and in their natural substrates (PubMed: <a href="#">3346228</a> ). However, all known phosphorylases share catalytic and structural properties (PubMed: <a href="#">3346228</a> ). |
| PYGL      | Phosphorylase is an important allosteric enzyme in carbohydrate metabolism. Enzymes from different sources differ in their regulatory mechanisms and in their natural substrates. However, all known phosphorylases share catalytic and structural properties.                                                                                                                                                                                                           |
| AGL       | Multifunctional enzyme acting as 1,4-alpha-D-glucan:1,4-alpha-D-glucan 4-alpha-D-glycosyltransferase and amylo-1,6-glycosidase in glycogen degradation.                                                                                                                                                                                                                                                                                                                  |
| HK1       | Glycerol-3-phosphate dehydrogenase, mitochondrial: This subpathway is part of the pathway glycerol degradation via glycerol kinase pathway, which is itself part of Polyol metabolism.                                                                                                                                                                                                                                                                                   |
| PFKM      | Glycerol-3-phosphate dehydrogenase, mitochondrial: This subpathway is part of the pathway glycerol degradation via glycerol kinase pathway, which is itself part of Polyol metabolism.                                                                                                                                                                                                                                                                                   |
| TALDO1    | Glycerol-3-phosphate dehydrogenase, mitochondrial: This subpathway is part of the pathway glycerol degradation via glycerol kinase pathway, which is itself part of Polyol metabolism.                                                                                                                                                                                                                                                                                   |
| ALDOC     | Glycerol-3-phosphate dehydrogenase, mitochondrial: This subpathway is part of the pathway glycerol degradation via glycerol kinase pathway, which is itself part of Polyol metabolism.                                                                                                                                                                                                                                                                                   |
| TPI1      | Glycerol-3-phosphate dehydrogenase, mitochondrial: This subpathway is part of the pathway glycerol degradation via glycerol kinase pathway, which is itself part of Polyol metabolism.                                                                                                                                                                                                                                                                                   |
| GPD2      | Glycerol-3-phosphate dehydrogenase, mitochondrial: This subpathway is part of the pathway glycerol degradation via glycerol kinase pathway, which is itself part of Polyol metabolism.                                                                                                                                                                                                                                                                                   |

**Table S4: List of glycolytic proteins used in scRNA seq analysis.**

**Supplementary Figures:**

**Figure S1:**

| Color Vector          | Channel 0<br>RGB image                                                            | Channel 1<br>hematoxylin                                                          | Channel 2<br>PAS or eosin                                                           | Channel 3<br>= Channel 0 –<br>(Channel 1 +<br>Channel 2)                            |
|-----------------------|-----------------------------------------------------------------------------------|-----------------------------------------------------------------------------------|-------------------------------------------------------------------------------------|-------------------------------------------------------------------------------------|
| (A) Hematoxylin-PAS   | 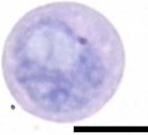 |  |  |  |
| (B) Hematoxylin-Eosin |  |  |  |  |

**Figure S1: Semi-quantitative Assays of PAS+ content**

Example of the commonly used color deconvolution in RGB performed with color vectors for HPC from healthy old donor stained by (A) hematoxylin-PAS and (B) hematoxylin-eosin. Channel 0 is the RGB image after correcting the background. The subtraction of Channel 1 (hematoxylin) and Channel 2 (PAS or eosin) from Channel 0 should result in no signal in Channel 3. The remaining signals in Channel 3 clearly indicate that the color deconvolution failed. Scale bar: 10  $\mu$ m. Software: Fiji plug-in Color Inspector 3D.

Figure S2:

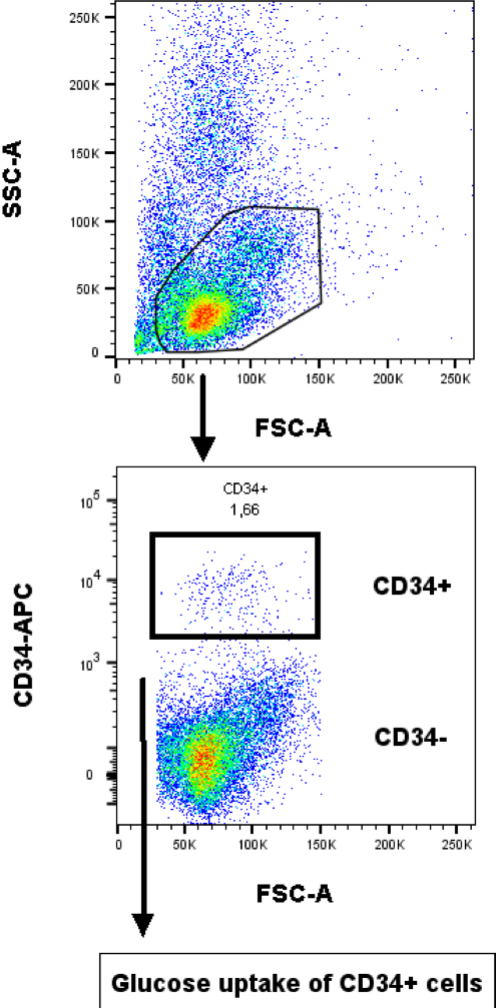

Figure S2: Example of the FACS gating strategy for CD34+ cells  
Cells are sorted based on their CD34 expression. Software: FlowJo v10.6.2.



Figure S3:

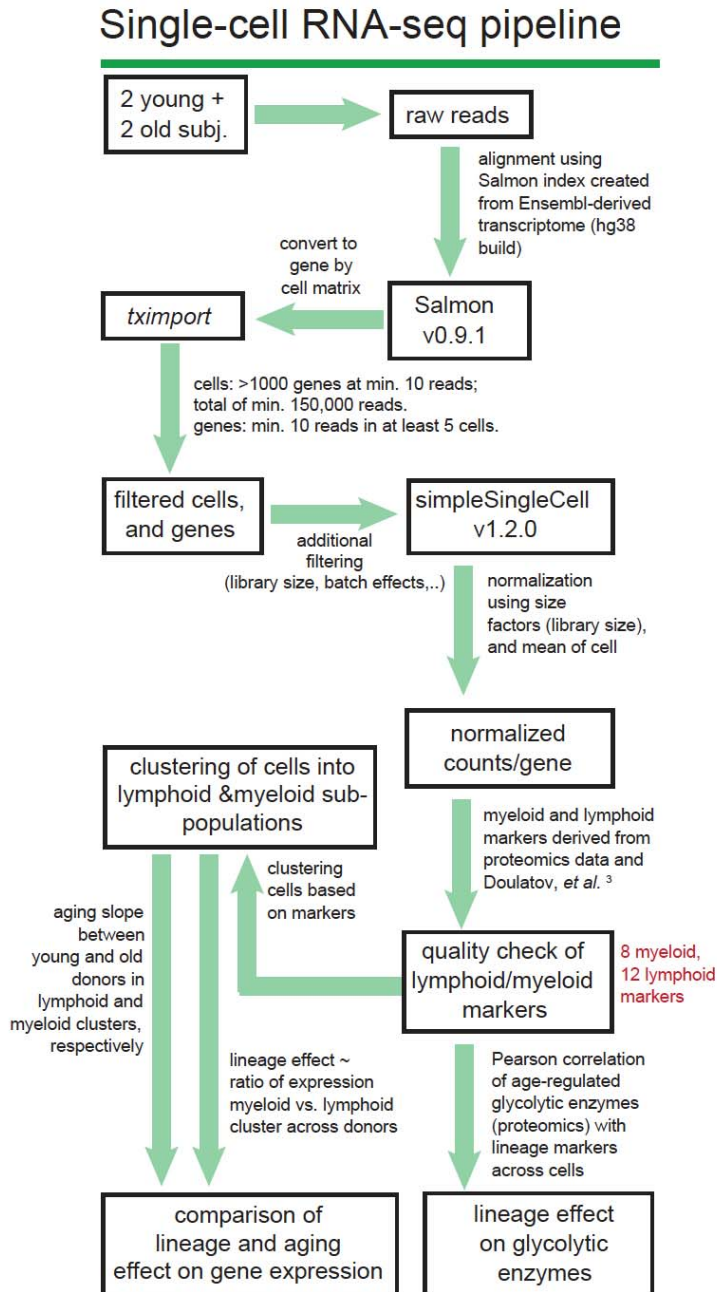

Figure S3: Single-cell RNA-seq processing pipeline after acquisition of raw reads.

Access number for the scRNA seq data:

<https://www.ncbi.nlm.nih.gov/geo/query/acc.cgi?acc=GSE115353>

Figure S4

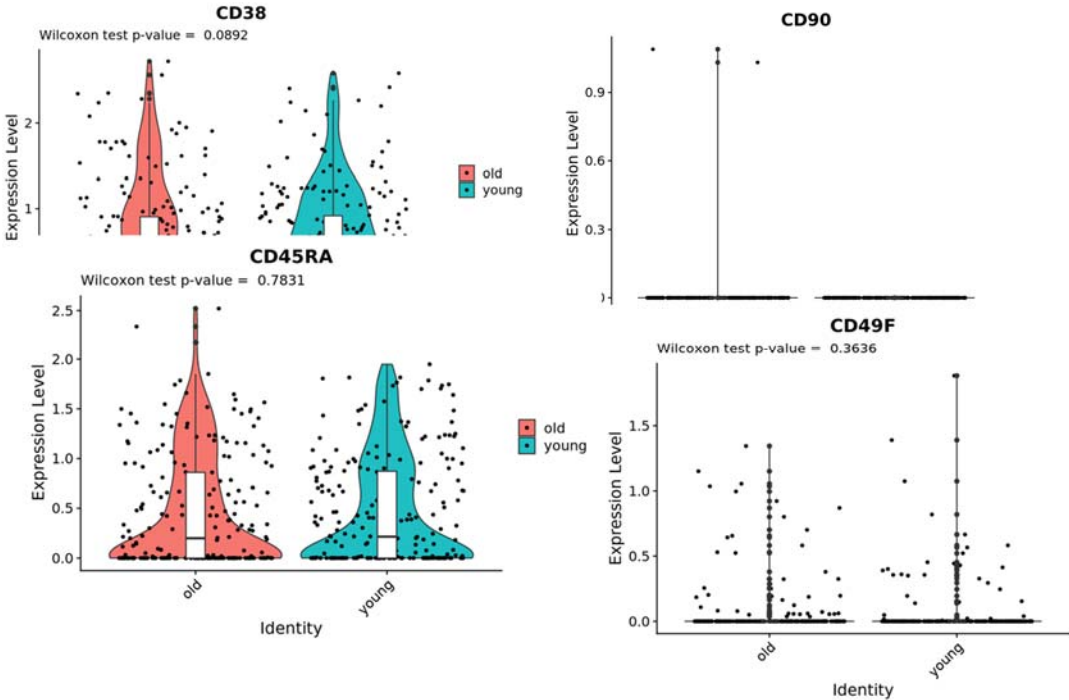

Figure S4: Aging and Surface Markers for HPCs.

Relationship between aging of CD34+ cells and co-expressions of CD38, CD90, CD45RA and CD49f, based on single-cell transcriptomics study. Software: Python 2.7
